# Supplementary material for: Template-assisted loading of Fe3O4 nanoparticles inside hollow carbon “rooms” to achieve high volumetric lithium storage
Source: Royal Society of Chemistry journal article supplement (doi:10.1039/d0nr01976c), 2020-01-01
Supplement: d0nr01976c1.pdf [file d0nr01976c1.pdf]

## Supporting Information for

### Template-assisted loading of Fe<sub>3</sub>O<sub>4</sub> nanoparticles inside hollow carbon “rooms” to achieve high volumetric lithium storage

*Yongpeng Cui,<sup>1</sup> Wenting Feng,<sup>1</sup> Wei Liu,\* Jiajia Li, Yuan Zhang, Yongxu Du, Mingzhu Li, Wei Huang, Huanlei Wang, Shuang Liu*

*School of Materials Science and Engineering, Ocean University of China, Qingdao 266100, People's Republic of China.*

<sup>1</sup> *The authors Yongpeng Cui and Wenting Feng contributed equally to this paper.*

\*Email: weiliu@ouc.edu.cn

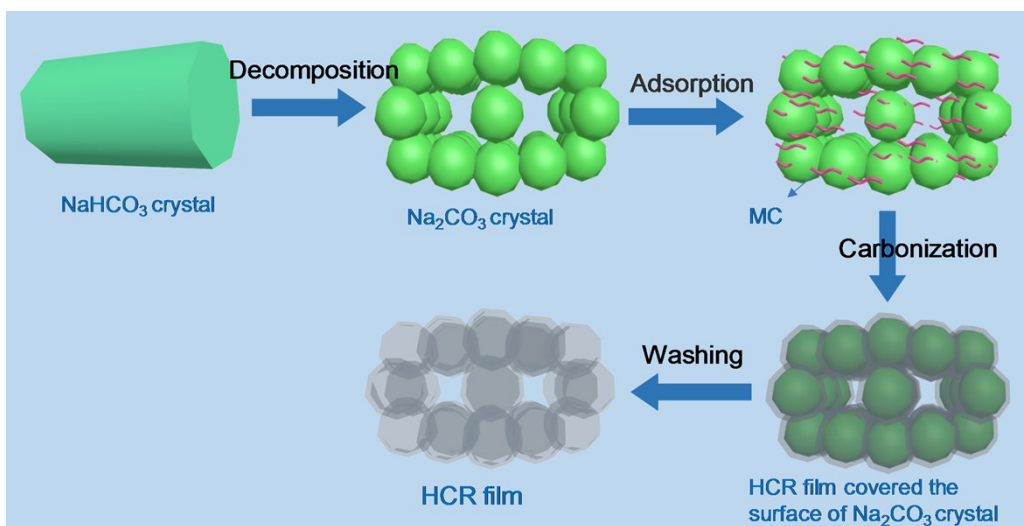

**Figure S1.** Schematic diagram of the synthesis process for HCR materials.

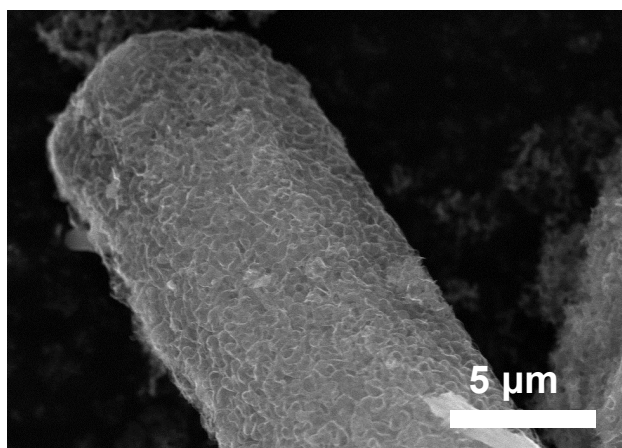

**Figure S2.** SEM micrographs of HCR materials.

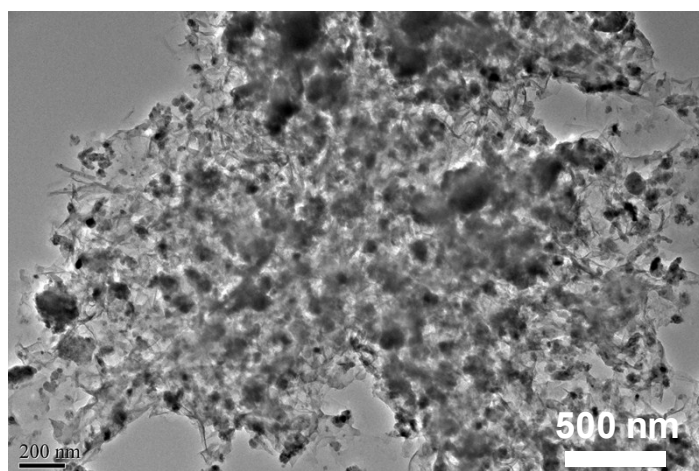

**Figure S3.** TEM micrographs of the HCR@Fe<sub>3</sub>O<sub>4</sub> materials.

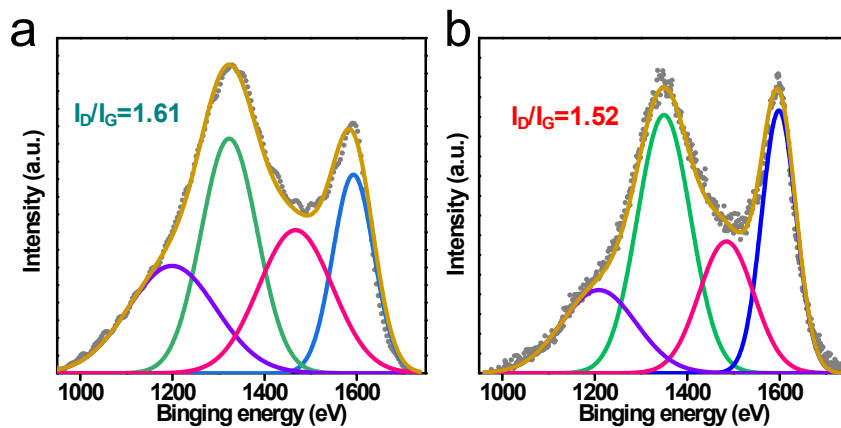

**Figure S4.** Raman spectra of (a) HCR and (b) HCR@Fe<sub>3</sub>O<sub>4</sub>.

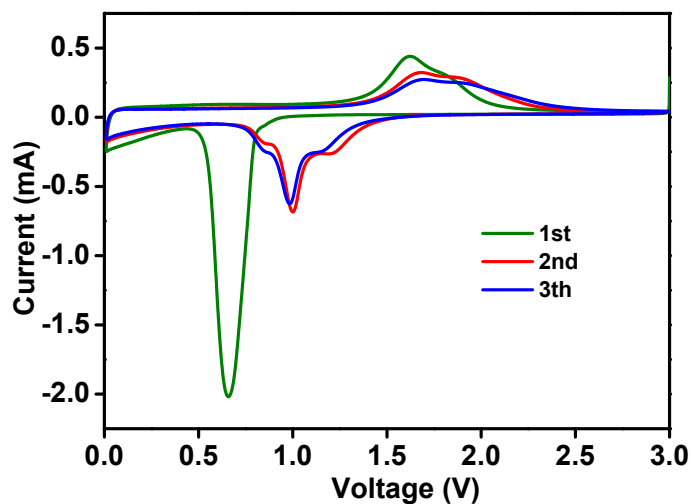

**Figure S5.** CV curves of pure Fe<sub>3</sub>O<sub>4</sub> electrode.

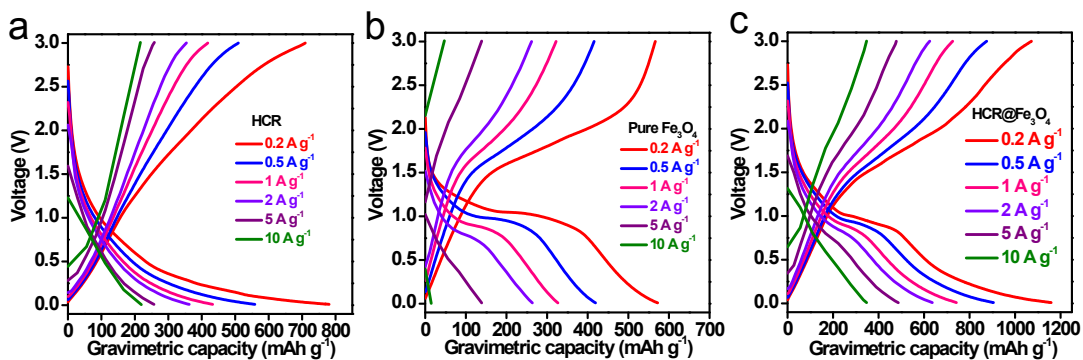

**Figure S6.** Galvanostatic charge-discharge curves of (a) HCR, (b) pure Fe<sub>3</sub>O<sub>4</sub>, and (c) HCR@Fe<sub>3</sub>O<sub>4</sub> electrodes at the fifth cycle test at each current density.

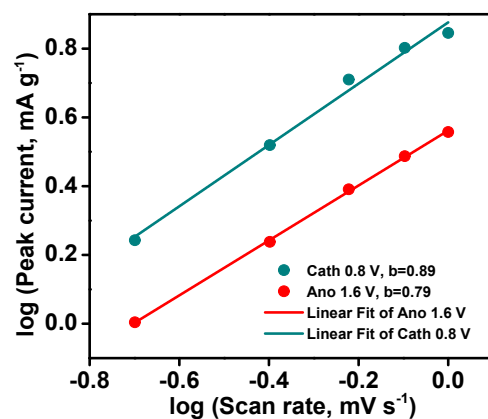

**Figure S7.** Determination of the b-value according to the relationship between peak current and scan rate.

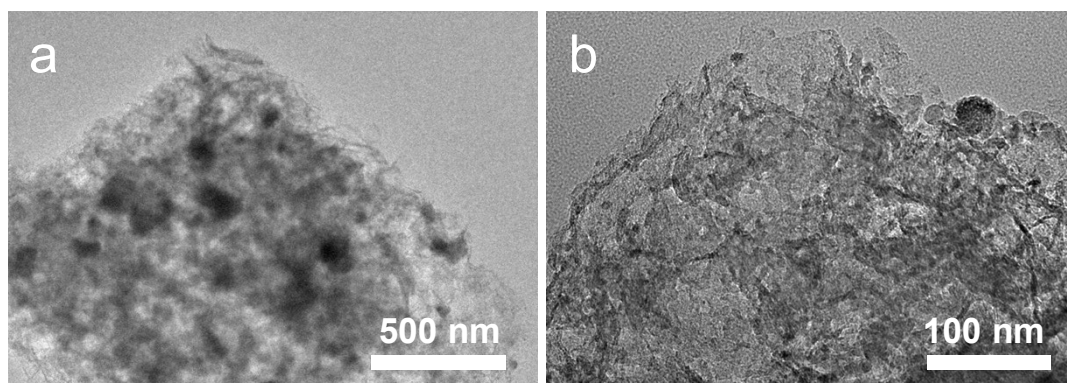

**Figure S8.** TEM micrographs of HCR@Fe<sub>3</sub>O<sub>4</sub> electrode after a cycling test.

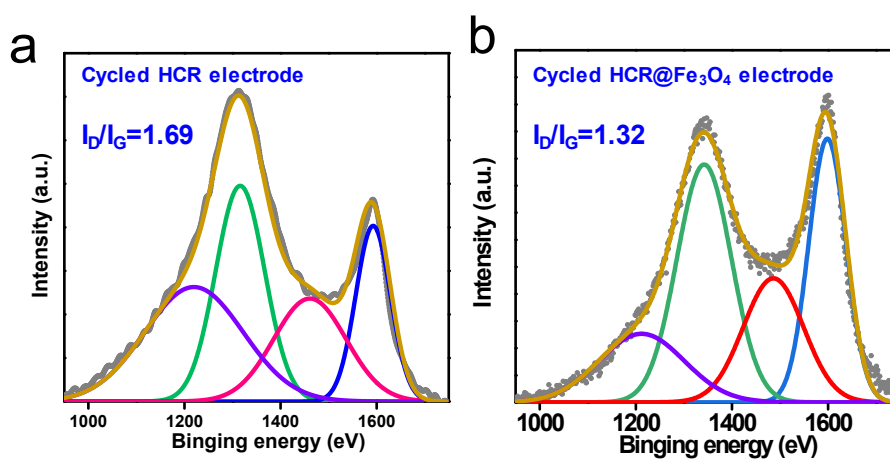

**Figure S9.** Raman spectra of cycled HCR and HCR@Fe<sub>3</sub>O<sub>4</sub> electrode after a cycling test.

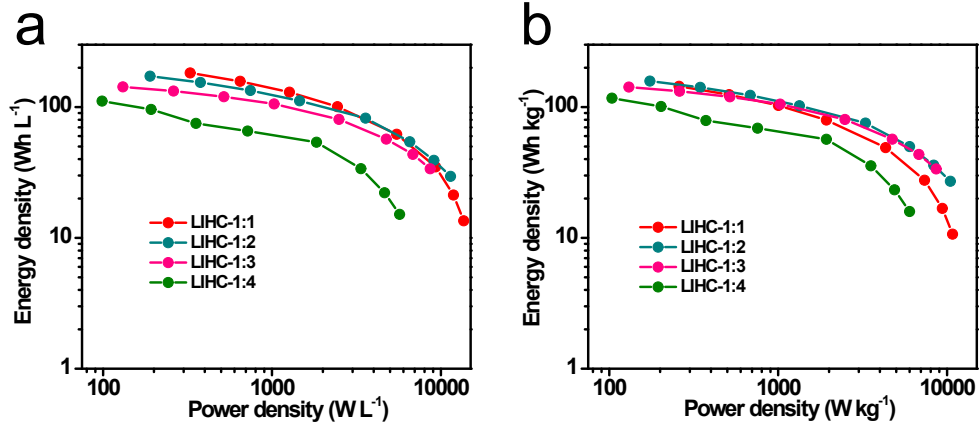

**Figure S10.** Ragone plots of the present HCR@Fe<sub>3</sub>O<sub>4</sub>//AC LIHC device with different mass match. (a) Volumetric energy/power density. (b) Gravimetric energy/power density.
